# Supplementary material for: WITHDRAWN: Diagnosis of Gout is not Associated with Growth of Abdominal Aortic Aneurysms
Source: Research Square preprint supplement (doi:10.21203/rs.3.rs-656782/v1), 2021-07-07
Supplement: Supplementary file 1 [file e591e857e04bd06ee960ab69.docx]

*Supplementary table 1: Sub-analysis of the model testing potential interaction of the included covariates between the groups on AAA growth*

| *Covariates* | *Value* | *Standard error* | *p value* |
| --- | --- | --- | --- |
| (Intercept) | 34.4 | 1.9 | <0.001 |
| Diagnosis of gout | -1.3 | 1.7 | 0.44 |
| Follow up | 1.3 | 1.2 | 0.25 |
| Initial AAA diameter tertile 2 | 7.0 | 1.2 | <0.001 |
| Initial AAA diameter tertile 3 | 14.8 | 1.1 | <0.001 |
| BMI | -0.1 | 0.1 | 0.25 |
| Stroke | -0.4 | 1.4 | 0.75 |
| ACEI | 0.8 | 1.0 | 0.43 |
| ARB | 1.1 | 1.1 | 0.34 |
| CCB | -0.1 | 1.0 | 0.96 |
| *Two-way interaction* | | | |
| Patient group*Follow up | 0.5 | 1.1 | 0.64 |
| Patient group*Initial AAA diameter tertile 2 | -0.2 | 1.0 | 0.87 |
| Patient group* Initial AAA diameter tertile 3 | -1.2 | 1.0 | 0.20 |
| Patient group*BMI | 0.0 | 0.1 | 0.36 |
| Patient group*Stroke | 0.0 | 1.1 | 0.99 |
| Patient group*ACEI | -0.4 | 0.9 | 0.68 |
| Patient group*ARB | -0.5 | 1.0 | 0.59 |
| Patient group*CCB | 0.2 | 0.8 | 0.82 |
| Follow up* Initial AAA diameter tertile 2 | -0.2 | 0.6 | 0.70 |
| Follow up* Initial AAA diameter tertile 3 | 0.9 | 0.6 | 0.14 |
| Follow up*BMI | 0.0 | 0.0 | 0.66 |
| Follow up*Stroke | -0.4 | 0.8 | 0.61 |
| Follow up*ACEI | -0.4 | 0.6 | 0.50 |
| Follow up*ARB | -1.2 | 0.7 | 0.06 |
| Follow up*CCB | 0.0 | 0.6 | 0.97 |
| *Three-way interaction* | | | |
| Patient group*Follow up*Initial AAA diameter tertile 2 | 0.4 | 0.6 | 0.51 |
| Patient group*Follow up*Initial AAA diameter tertile 3 | -0.7 | 0.5 | 0.20 |
| Patient group*Follow up*BMI | 0.0 | 0.0 | 0.46 |
| Patient group*Follow up*Stroke | 0.1 | 0.6 | 0.84 |
| Patient group*Follow up*ACE | 0.2 | 0.5 | 0.77 |
| Patient group*Follow up*ARB | 0.6 | 0.6 | 0.26 |
| Patient group*Follow up*CCB | -0.1 | 0.5 | 0.91 |

AAA, Abdominal aortic aneurysm; ACEI, Angiotensin converting enzyme inhibitor; ARB, Angiotensin receptor blockers; BMI, Body mass index; CCB, Calcium channel blocker; CI, Confidence interval.

Supplementary table 2: Standardized mean differences of covariates following propensity score matching in participants with and without a prior diagnosis of gout

| *Covariates* | *SMD* |
| --- | --- |
| Final AAA diameter | -0.01 |
| Initial AAA diameter | -0.11 |
| BMI | 0.04 |
| Stroke | -0.12 |
| ACEI | 0.09 |
| ARB | -0.07 |
| CCB | 0.10 |

AAA, Abdominal aortic aneurysm; ACEI, Angiotensin converting enzyme inhibitor; ARB, Angiotensin receptor blockers; BMI, Body mass index; CCB, Calcium channel blocker; SMD, Standardised mean difference.
